# Supplementary material
Source: PubMed Central journal article supplement (PMC8871658)
Supplement: mmc1.pdf [file mmc1.pdf]

# THE LANCET Rheumatology

## Supplementary appendix

This appendix formed part of the original submission. We post it as supplied by the authors.

Supplement to: The Editors of The Lancet Rheumatology. Thank you to our peer reviewers in 2021. *Lancet Rheumatol* 2022; **4**: e168–69.

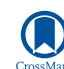

## Thank you to *The Lancet Rheumatology's* clinical and statistical peer reviewers in 2021

|                        |                              |                          |
|------------------------|------------------------------|--------------------------|
| Abhishek Abhishek      | Neal Chen                    | Teresa Giani             |
| Anil Agarwal           | Hyonkyoo Choi                | Dafna Gladman            |
| Bilal Ahmed            | Maria Cid*                   | Miguel A Gonzalez-Gay    |
| Rieke Alten            | Gustavo Citera               | Laure Gossec             |
| Alessia Alunno         | Adrian Ciurea                | Rebecca Grainger         |
| Koichi Amano           | Nicholas Clement             | Rebecca Haberman*        |
| Alessandro Antonelli   | Laura Coates                 | Najia Hajjaj-Hassouni    |
| Simone Appenzeller     | Stanley B Cohen              | Masayoshi Harigai        |
| Martin Aringer         | Rosie Cornish                | Ian Harris               |
| Laurent Arnaud         | Nathalie Costedoat-Chalumeau | Lauren Henderson         |
| Shervin Assassi        | Randy Cron**                 | Jan-Inge Henter          |
| Adria Aterido Ballonga | Lorenzo Dagna                | Merete Hetland           |
| Jerome Avouac          | Nicola Dalbeth               | Kristin Highland         |
| Christoph Baerwald     | Bhaskar Dasgupta             | Catherine Hill           |
| Chiara Baldini         | Ana de Medeiros              | Robert Hoffman           |
| Alejandro Balsa        | Annette De Thurah            | Anna-Maria Hoffmann-Vold |
| Thomas Bardin          | Spyros Deftereos             | Hitoshi Honda            |
| Anne Barton            | Emanuel Della-Torre          | John D Isaacs            |
| David Beard            | Alfons den Broeder           | David Isenberg           |
| David Beck             | Betty Diamond                | Tim Jansen               |
| James Bentham          | Munyaradzi Dimairo           | David Jayne              |
| Jean-Marie Berthelot   | Oliver Distler               | Ru-Rong Ji               |
| Sheila Bird            | Laura Doornekamp             | Christoffer Jørgensen    |
| Laura Boekel*          | Maxime Dougados              | Steven Julious           |
| Mary R Boland          | Michael Ehrenstein           | Brennan C Kahan          |
| Claudio Borghi         | Seth Eisen                   | Andre Kalil              |
| Silvia Laura Bosello   | Paul Emery                   | Paras Karmacharya        |
| David Bossingham       | Jaime Esteban                | Mitsuhiro Kawano         |
| Jürgen Braun*          | Denise Eygendaal             | Kate Kernan              |
| Elisabeth Brouwer      | Forough Farrokhyar**         | Stephen Kerr             |
| Edward Burn            | Bruno Fautrel                | Dinesh Khanna            |
| Frank Buttgercit       | Gianfranco Ferraccioli       | Ali Khashan              |
| Peter H Byers          | Clodoveo Ferri               | Erica Kholinne           |
| Cassandra Calabrese    | Tristan Ferry                | Alfred Kim**             |
| Leonard Calabrese      | Ivan Foeldvári               | Stefan Knop              |
| Jeffrey Callen         | Lisa Forbes                  | Kristian Kragholm        |
| Jackie Campbell        | Victoria Furer*              | Masanari Kuwabara        |
| Corrado Campochiaro    | James Galloway               | Masataka Kuwana          |
| Scott Canna            | Wei Gao                      | Tore K Kvien             |
| Fabrizio Cantini       | Thorsten Gehrke              | Paul La Rosee            |
| Giulio Cavalli**       | Andy Gennery                 | Robert Landewe           |
| Vinod Chandran         | Mark Genovese                | Mark Lebowhl             |
| Antonia Chen           | Milena Gianfrancesco         | Eun Bong Lee             |

|                       |                                |                                                            |
|-----------------------|--------------------------------|------------------------------------------------------------|
| Simon Lee             | John Pauling                   | Vibeke Strand                                              |
| Yvonne Lee            | Greta Pellegrino               | Charlotte Summers                                          |
| Ying Ying Leung       | Mark Perry                     | Georges Sumo Ngaha                                         |
| Joel Lexchin          | Kristian Kjær Petersen         | David Sykes                                                |
| Jean Liew             | Evangeline Pillebout           | Tsutomu Takeuchi                                           |
| Dan Lipsker           | Michael Pillinger              | Yoshiya Tanaka                                             |
| Mark Litaker          | Janet Pope                     | Rachel Tattersall                                          |
| Sara Lodi             | Anton Pottegård                | Anne-Kathrin Tausche                                       |
| Stefan Lohmander      | Robin Prescott                 | Peter Taylor                                               |
| Thomas Lüscher        | Susanna Proudman               | Sara Tedeschi                                              |
| Sarah Mackie*         | Rodrigo Pubel Viera de Rezende | Brett Thombs                                               |
| Graeme MacLaren       | Michael Putman                 | Michael Toprover                                           |
| Graeme MacLennan      | Wendi Qian**                   | Cornelia Van den Ende                                      |
| Satveer Mahil         | Pierre Quartier                | Annette van der Helm-van Mil                               |
| Julia Manasson        | Kaitlin Quinn                  | Diane van der Woude                                        |
| Adrian Paul Mander    | Athimalaipet Ramanan           | Joel van Roon                                              |
| Jessica Manson        | Pascal Richette                | Lisette Van Suijlekom-Smit                                 |
| Xavier Mariette       | Alan S Rigby                   | Peter Villiger                                             |
| Alberto Martini       | Richard Riley                  | Elizabeth Volkmann                                         |
| Marco Matucci-Cerinic | Philip Robinson**              | Kalliopi Vrotsou                                           |
| Noel G McElvaney      | Alan Rosenberg                 | Daniel Wallace                                             |
| Flora McErlane        | Elizabeth Rosser               | Zachary Wallace*                                           |
| Dennis McGonagle      | Andrea Rubbert-Roth            | Mark Walter                                                |
| Puja Mehta*           | Karl Saardi                    | James Wason*                                               |
| Tony Merriman         | Frank Sandmann                 | Ryu Watanabe                                               |
| Kaleb Michaud         | Sebastian Sattui               | Fiona Watt                                                 |
| Ramnath Misra         | Amit Saxena                    | Brandon Webb                                               |
| Chi Chiu Mok          | Georg Schett                   | Lucy Wedderburn                                            |
| Michael Mont          | Naomi Schlesinger              | Jie Wei                                                    |
| Sara Monti            | Oskar Schnappauf               | Brian Werner                                               |
| Rong Mu               | Karen Schreiber*               | Jeremy Wilkinson                                           |
| Ulf Müller-Ladner     | Grant Schultert                | Anthony Wilson                                             |
| Flor Munoz            | Hendrik Schulze-Koops          | Paul Wolters                                               |
| Peter Nash            | Alexandre Sepriano             | Arnold Wong                                                |
| Tuhina Neogi          | Emire Seyahi                   | Justin Wong Chung                                          |
| Jill Newby            | Yehuda Shoenfeld               | Gillian Worthy                                             |
| Mandana Nikpour       | Gabriele Simonini              | Marjan Wouthuyzen-Bakker                                   |
| John Norrie*          | Jasvinder Singh                | Maddalena Wu                                               |
| Kate Northstone       | Francisca Sivera               | Motohisa Yamamoto                                          |
| Ayodele Ogunleye      | Enrique Soriano                | Wen Zhang                                                  |
| Rene Oliveira         | Jeffrey Sparks                 | Zhuoli Zhang                                               |
| Ana-Maria Orbai       | Tanja Stamm                    | Jixin Zhong                                                |
| Marcin Osuchowski     | Lisa Stamp                     | Feng-Cai Zhu                                               |
| Naim Ouldali          | Virginia Steen                 | Nelly Ziade                                                |
| Seza Özen             | William Stohl                  | Copyright © 2022 The Author(s). Published by Elsevier Ltd. |
| Julie Paik**          | Matthew Stoll                  | <i>The Lancet Rheumatology Editors</i>                     |
| Young-Hoon Park       | John Stone                     |                                                            |
